# Supplementary material
Source: publisher figshare collection journal article supplement (https://acs.figshare.com/ndownloader/files/13997942)
Supplement: Supplementary file 1 [file 13997942]

## SUPPORTING INFORMATION

# Indoor exposure to ambient particles and its estimation using fixed site monitors

Wenwei Che,<sup>1,2,3,\*</sup> H. Christopher Frey,<sup>4,5</sup> Zhiyuan Li,<sup>4</sup> Xiangqian Lao,<sup>6</sup> Alexis K.H. Lau<sup>1,4</sup>

<sup>1</sup> Department of Civil and Environmental Engineering, The Hong Kong University of Science and Technology, Clear Water Bay, Hong Kong, China

<sup>2</sup> HKUST Jockey Club Institute for Advanced Study, The Hong Kong University of Science and Technology, Clear Water Bay, Hong Kong, China

<sup>3</sup> Institute for Environment and Climate Research, Jinan University, Guangzhou, China

<sup>4</sup> Division of Environment and Sustainability, The Hong Kong University of Science and Technology, Clear Water Bay, Hong Kong, China

<sup>5</sup> Department of Civil, Construction and Environmental Engineering, North Carolina State University, Campus Box 7908, Raleigh, North Carolina 27695-7908, United States

<sup>6</sup> JC School of Public Health and Primary Care, the Chinese University of Hong Kong, Hong Kong SAR, China

Number of pagers: 16

Number of figures: 4

Number of tables: 7

## DESCRIPTION OF TABLES AND FIGURES

Description of selected schools and FSMs is listed in Table S1. A summary for measurement at selected schools are given in Table S2. Hourly average  $PM_{2.5}$  concentrations at schools and fixed site monitors (FSMs) are listed in Table S3. Spearman Correlation Coefficients (SCC) between indoor and outdoor  $PM_{2.5}$  concentrations and between school outdoor measurements and FSMs are listed in Table S4 and S5, respectively. Infiltration factors estimated with and without autocorrelation are listed in Table S6. Proximity factors estimated between selected schools and FSMs are listed in Table S7. The instrument package and results of instrument calibration are shown in Figure S1 and S2, respectively. Examples of time series of measured  $PM_{2.5}$  concentrations at selected schools during winter and summer are shown in Figure S3. Wind rose maps from a background meteorological station in Hong Kong during winter and summer sampling periods are shown in Figure S4.

## SCHOOL MEASUREMENT

For each school, indoor PM<sub>2.5</sub> concentrations were measured in classrooms and non-classrooms. The classrooms selected for both schools were on the 1<sup>st</sup>, 3<sup>rd</sup>, and 6<sup>th</sup> floors, each with class size of around 30 students. Blackboards and chalk were used in the classrooms at both schools. The non-classrooms include a ground floor conference room and a 7<sup>th</sup> floor mentor room at School A, and a ground floor meeting room and 7<sup>th</sup> floor multimedia room at school B. Each room was sampled for two days in each school and season. Simultaneous outdoor PM<sub>2.5</sub> concentrations were measured on pedestrians with horizontal distance of less than 0.5 km from the school.

## AUTOCORRELATION

Continuous measurements have been reported to be autocorrelated, indicating serial dependence with previous observations.<sup>1</sup> The impact of autocorrelation on the estimation of IF is examined by adding a lag1 auto-aggressive correction on the error term of the linear regression model:<sup>2</sup>

$$C_{idr,s,p,t} = IF_{s,p} C_{odr,s,p,t} + C_{NA,s,p,t} + \varepsilon_t \quad (S-1)$$

$$\varepsilon_{s,p,t} = \rho_{s,p} \varepsilon_{s,p,t-1} + \omega_t \quad (S-2)$$

Where,

$C_{idr,s,p,t}$  = Indoor PM<sub>2.5</sub> concentrations at school  $s$  in season  $p$  at time  $t$  ( $\mu\text{g}/\text{m}^3$ );

$C_{odr,s,p,t}$  = Outdoor PM<sub>2.5</sub> concentrations at school  $s$  in season  $p$  at time  $t$  ( $\mu\text{g}/\text{m}^3$ );

$C_{NA,s,p,t}$  = Non-ambient component of indoor concentration at school  $s$  in season  $p$  at time  $t$  ( $\mu\text{g}/\text{m}^3$ );

$IF_{s,p}$  = Infiltration factor derived for school  $s$  in season  $p$ , unitless;

$\varepsilon_t$  = random error ( $\mu\text{g}/\text{m}^3$ );

$idr$  = Indoor location (e.g. classroom);

$s$  = School index (e.g. School A, School B);

$p$  = Season (e.g. winter, summer);

$t$  = Time step (hour);

$odr$  = Outdoor location in close proximity to the school, which is the nearest transect in this study;

NA = Non-ambient sources.

$\varepsilon_{s,p,t}$  = auto-correlated error term at school  $s$  in season  $p$  at time step  $t$ ;

$\rho_{s,p}$  = autocorrelation parameter at school  $s$  in season  $p$ , unitless;

$\varepsilon_{s,p,t-1}$  = error term in the time serial with lag time of 1 hour;

$\omega_t$  = independent error term.

The IF values were calculated for each school and season with and without autocorrelation correction, as listed in Table S6. For 1-hour time interval, there is no significant difference in IF estimates between with and without autocorrelation correction. The autocorrelation parameter was positive for both schools in winter and summer, indicating positive autocorrelations in the time series, which was consistent with the positive correlations found in continuous PM<sub>2.5</sub> observations in previous studies.<sup>3,4</sup> In winter, the outdoor variations in PM<sub>2.5</sub> concentration explained 98% to 99% of the variations observed in the indoor PM<sub>2.5</sub> concentrations at both schools. The autocorrelation did not add additional

explanation power. In summer, the outdoor variations in  $PM_{2.5}$  concentration explained 7% and 13% of the variations observed in the indoor  $PM_{2.5}$  concentrations at school A and B, respectively. The autocorrelation explained another 58% and 36% of the indoor variations in summer. Low air exchange rates due to closed doors and windows in summer increased the autocorrelation in the indoor PM concentrations. However, the indoor concentrations in summer were much lower than those in winter; therefore, the added explanation power by accounting for autocorrelation in summer did not add much in terms of explaining long term exposure concentrations over both seasons.

**Table S1.** Description of selected schools and fixed site monitors

| School                                             | Location          | Built Year | Elev. <sup>a</sup><br>(m) | Season                    | Period                   | Indoor Location         |                             | Ventilation type and practice |             |                                   |               |            |
|----------------------------------------------------|-------------------|------------|---------------------------|---------------------------|--------------------------|-------------------------|-----------------------------|-------------------------------|-------------|-----------------------------------|---------------|------------|
|                                                    |                   |            |                           |                           |                          | Class-room <sup>b</sup> | Non-class-room <sup>b</sup> | A/C <sup>c</sup>              | Ceiling fan | Inlet/Exhaust fan                 | Window        | Door       |
| A                                                  | Hill              | 2002       | 82                        | Winter                    | 5/1/2015-16/1/2015       | √                       | √                           | Off                           | Off         | Off                               | Open          | Open       |
| B                                                  | Valley            | 1990       | 6                         | Summer                    | 1/6/2015-12/6/2015       | √                       | √                           | On                            | On          | On                                | Closed        | Closed     |
|                                                    |                   |            |                           | Winter                    | 19/1/2015-30/1/2015      | √                       | √                           | Off                           | Off         | Off                               | Slightly Open | Open       |
|                                                    |                   |            |                           | Summer                    | 15/6/2015-26/6/2015      | √                       | √                           | On                            | On          | On                                | Open          | Closed     |
| School outdoor measurement and fixed site monitors |                   |            |                           |                           |                          |                         |                             |                               |             |                                   |               |            |
| Site                                               | Site Name         | Site type  | Land use                  | Elev. <sup>a</sup><br>(m) | S.H. <sup>d</sup><br>(m) | Distance (km)           |                             | Relative position             |             | Area characteristics <sup>e</sup> |               |            |
|                                                    |                   |            |                           |                           |                          | to school A             | to school B                 | to school A                   | to school B | Residential                       | Commercial    | Industrial |
| Transect_A                                         | School A transect | Roadside   | Urban                     | 82                        | 1.5                      | <0.5                    | -                           | N                             | -           | √                                 |               |            |
| Transect_B                                         | School B transect | Roadside   | Urban                     | 6                         | 1.5                      | -                       | <0.5                        | -                             | SE          | √                                 | √             | √          |
| R1                                                 | Causeway Bay      | Roadside   | Urban                     | 5                         | 3                        | 12.2                    | 12.5                        | SE                            | S           |                                   | √             |            |
| R2                                                 | Central           | Roadside   | Urban                     | 5                         | 4.5                      | 10.2                    | 13.1                        | SE                            | SW          |                                   | √             |            |
| R3                                                 | Mong Kok          | Roadside   | Urban                     | 7                         | 3                        | 8.1                     | 8.6                         | SE                            | SW          | √                                 | √             |            |
| G1                                                 | Central/Western   | General    | Urban                     | 67                        | 16                       | 9.1                     | 13.4                        | SE                            | SW          | √                                 | √             |            |
| G2                                                 | Eastern           | General    | Urban                     | 14                        | 15                       | 14.8                    | 12                          | SE                            | S           | √                                 |               |            |
| G3                                                 | Kwai Chung        | General    | Urban                     | 7                         | 13                       | 3.2                     | 8.9                         | E                             | SW          | √                                 | √             | √          |
| G4                                                 | Kwun Tong         | General    | Urban                     | 10                        | 25                       | 13.9                    | 8.8                         | SE                            | S           | √                                 | √             | √          |
| G5                                                 | Sha Tin           | General    | Urban                     | 7                         | 25                       | 9.2                     | 2.9                         | NE                            | SW          | √                                 |               |            |
| G6                                                 | Sham Shui Po      | General    | Urban                     | 5                         | 17                       | 6.9                     | 8.4                         | SE                            | SW          | √                                 | √             |            |
| G7                                                 | Tai Po            | General    | Urban                     | 7                         | 25                       | 12.7                    | 8.1                         | NE                            | NW          | √                                 |               |            |
| G8                                                 | Tsuen Wan         | General    | Urban                     | 5                         | 17                       | 2.5                     | 9.8                         | NE                            | SW          | √                                 | √             | √          |
| G9                                                 | Tung Chung        | General    | Urban                     | 8                         | 27.5                     | 17.5                    | 29.5                        | SW                            | SW          | √                                 |               |            |
| G10                                                | Yuen Long         | General    | Urban                     | 7                         | 25                       | 12.7                    | 20                          | NW                            | NW          | √                                 |               |            |
| BG                                                 | Tap Mun           | Background | Rural                     | 16                        | 11                       | 29.9                    | 18.1                        | NE                            | NE          |                                   |               |            |

Note: <sup>a</sup> The elevation (Elev.) refers to the height above mean sea level.

<sup>b</sup> The selected classrooms were located on the 1<sup>st</sup>, 3<sup>rd</sup>, and 6<sup>th</sup> floors; the selected non-classrooms were located on the ground floor and the 7<sup>th</sup> floor.

<sup>c</sup> The air conditioner type at school A and school B are both standalone A/C unit.

<sup>d</sup> The sampling height (S.H.) refers to the height above ground.

<sup>e</sup> The area characteristics describe the land use property of site surroundings.

**Table S2.** Mean and standard deviation (std) of 1-hour average indoor and outdoor (transect) PM<sub>2.5</sub> concentrations, CO<sub>2</sub> concentration, temperature and humidity by school and season.

| School | Season <sup>a</sup> | Location | PM <sub>2.5</sub> (µg/m <sup>3</sup> ) |     | CO <sub>2</sub> (ppm) |     | Temperature (°C) |     | Relative humidity (%) |     | Humidity (g/m <sup>3</sup> ) <sup>b</sup> |     |
|--------|---------------------|----------|----------------------------------------|-----|-----------------------|-----|------------------|-----|-----------------------|-----|-------------------------------------------|-----|
|        |                     |          | Mean                                   | std | Mean                  | std | Mean             | std | Mean                  | std | Mean                                      | std |
| A      | Winter              | Indoor   | 42                                     | 19  | 430                   | 80  | 19.3             | 1.6 | 57                    | 11  | 9.5                                       | 2.5 |
|        |                     | Outdoor  | 43                                     | 20  | 380                   | 30  | 19.9             | 3.6 | 61                    | 15  | 10.4                                      | 2.8 |
|        | Summer              | Indoor   | 6                                      | 2   | 920                   | 500 | 27.7             | 2.9 | 61                    | 9   | 16.9                                      | 5.2 |
|        |                     | Outdoor  | 7                                      | 2   | 400                   | 20  | 32.8             | 2.0 | 70                    | 9   | 24.3                                      | 1.2 |
| B      | Winter              | Indoor   | 60                                     | 38  | 400                   | 50  | 20.5             | 1.3 | 51                    | 12  | 9.1                                       | 2.5 |
|        |                     | Outdoor  | 63                                     | 38  | 410                   | 50  | 21.6             | 2.7 | 49                    | 14  | 9.3                                       | 2.6 |
|        | Winter *            | Indoor   | 49                                     | 15  | 390                   | 50  | 20.5             | 1.3 | 51                    | 13  | 9.1                                       | 2.6 |
|        |                     | Outdoor  | 52                                     | 15  | 410                   | 50  | 21.6             | 2.6 | 50                    | 15  | 9.3                                       | 2.8 |
|        | Summer              | Indoor   | 5                                      | 2   | 720                   | 380 | 29.6             | 3.5 | 56                    | 9   | 17.1                                      | 4.4 |
|        |                     | Outdoor  | 7                                      | 2   | 490                   | 140 | 31.8             | 4.2 | 66                    | 15  | 21.9                                      | 3.4 |

Note:

<sup>a</sup> Values in “Winter\*” exclude data on Jan 21th 2015, on which an episode of unusually high PM<sub>2.5</sub> concentrations was observed.

<sup>b</sup> Humidity is not directly measured but is calculated from temperature (T) and relative humidity (RH) which were measured using Q-Trak.

**Table S3.** Average of hourly PM<sub>2.5</sub> concentration measured at indoor classroom and non-classroom, and selected outdoor locations by school and season

| <i>Season</i> | <i>School</i> | <i>Stats<sup>a</sup></i>       | <i>Indoor</i>     |                       |            | <i>Outdoor<sup>b</sup></i> |           |           |           |           |           |           |           |           |           |           |           |           |            |           |
|---------------|---------------|--------------------------------|-------------------|-----------------------|------------|----------------------------|-----------|-----------|-----------|-----------|-----------|-----------|-----------|-----------|-----------|-----------|-----------|-----------|------------|-----------|
|               |               |                                | <i>Class-room</i> | <i>non-class-room</i> | <i>All</i> | <i>Transect</i>            | <i>R1</i> | <i>R2</i> | <i>R3</i> | <i>G1</i> | <i>G2</i> | <i>G3</i> | <i>G4</i> | <i>G5</i> | <i>G6</i> | <i>G7</i> | <i>G8</i> | <i>G9</i> | <i>G10</i> | <i>BG</i> |
| <i>A</i>      | <i>Winter</i> | <i>N<sup>c</sup></i>           | 32                | 28                    | 60         | 63                         | 64        | 62        | 60        | 29        | 70        | 65        | 68        | 67        | 66        | 70        | 69        | 68        | 67         | 69        |
|               |               | <i>Mean (µg/m<sup>3</sup>)</i> | 40                | 45                    | 42         | 43                         | 45        | 35        | 40        | 25        | 30        | 33        | 34        | 30        | 28        | 29        | 29        | 36        | 47         | 42        |
|               |               | <i>Std (µg/m<sup>3</sup>)</i>  | 22                | 14                    | 19         | 20                         | 14        | 14        | 13        | 13        | 15        | 12        | 16        | 14        | 11        | 13        | 13        | 19        | 17         | 17        |
|               | <i>Summer</i> | <i>N<sup>c</sup></i>           | 40                | 23                    | 63         | 69                         | 66        | 68        | 54        | 66        | 68        | 70        | 68        | 41        | 59        | 66        | 70        | 66        | 68         | 65        |
|               |               | <i>Mean (µg/m<sup>3</sup>)</i> | 6                 | 4                     | 6          | 7                          | 22        | 11        | 15        | 11        | 7         | 15        | 14        | 9         | 12        | 9         | 8         | 7         | 12         | 8         |
|               |               | <i>Std (µg/m<sup>3</sup>)</i>  | 1                 | 2                     | 2          | 2                          | 5         | 4         | 5         | 3         | 3         | 4         | 5         | 4         | 3         | 3         | 5         | 2         | 4          | 3         |
| <i>B</i>      | <i>Winter</i> | <i>N<sup>c</sup></i>           | 37                | 28                    | 65         | 65                         | 64        | 70        | 64        | 70        | 66        | 67        | 70        | 63        | 61        | 65        | 67        | 70        | 70         | 67        |
|               |               | <i>Mean (µg/m<sup>3</sup>)</i> | 63                | 56                    | 60         | 63                         | 67        | 51        | 53        | 56        | 45        | 48        | 55        | 48        | 39        | 47        | 43        | 45        | 60         | 59        |
|               |               | <i>Std (µg/m<sup>3</sup>)</i>  | 48                | 13                    | 38         | 37                         | 33        | 32        | 14        | 30        | 20        | 25        | 26        | 34        | 12        | 33        | 21        | 32        | 31         | 34        |
|               | <i>Summer</i> | <i>N<sup>c</sup></i>           | 38                | 28                    | 66         | 63                         | 70        | 58        | 58        | 65        | 67        | 67        | 68        | 67        | 53        | 68        | 66        | 70        | 60         | 66        |
|               |               | <i>Mean (µg/m<sup>3</sup>)</i> | 5                 | 4                     | 5          | 7                          | 20        | 13        | 16        | 10        | 7         | 14        | 11        | 9         | 12        | 8         | 9         | 6         | 11         | 7         |
|               |               | <i>Std (µg/m<sup>3</sup>)</i>  | 2                 | 1                     | 2          | 2                          | 7         | 5         | 5         | 3         | 4         | 4         | 5         | 5         | 3         | 3         | 5         | 3         | 4          | 4         |

Note:

<sup>a</sup> *N* = number of valid observations; Mean = hourly mean PM<sub>2.5</sub> concentrations (µg/m<sup>3</sup>); std = standard deviation in hourly PM<sub>2.5</sub> concentration (µg/m<sup>3</sup>).

<sup>b</sup> The full name and detail information for outdoor sites are given in Table S1.

<sup>c</sup> Some of the hourly PM<sub>2.5</sub> observations were missing due to the maintenance or malfunction of equipment.

**Table S4.** Spearman Correlation Coefficients for 1-hour average PM<sub>2.5</sub> concentrations between school indoor and selected outdoor locations

| School | Season | Statistic <sup>a</sup> | Outdoor <sup>b</sup> |             |             |             |             |             |             |             |             |             |             |             |             |             |             |
|--------|--------|------------------------|----------------------|-------------|-------------|-------------|-------------|-------------|-------------|-------------|-------------|-------------|-------------|-------------|-------------|-------------|-------------|
|        |        |                        | Tran-<br>sect        | R1          | R2          | R3          | G1          | G2          | G3          | G4          | G5          | G6          | G7          | G8          | G9          | G10         | BG          |
| A      | Winter | Distance (km)          | <0.5                 | 12.2        | 10.2        | 8.1         | 9.1         | 14.8        | 3.2         | 13.9        | 9.2         | 6.9         | 12.7        | 2.5         | 17.5        | 12.7        | 29.9        |
|        |        | <b>r</b>               | <b>0.98</b>          | <b>0.73</b> | <b>0.75</b> | <b>0.84</b> | <b>0.82</b> | <b>0.78</b> | <b>0.84</b> | <b>0.83</b> | <b>0.83</b> | <b>0.87</b> | <b>0.84</b> | <b>0.85</b> | <b>0.76</b> | <b>0.76</b> | <b>0.86</b> |
|        |        | <i>p-value</i>         | <.0001               | <.0001      | <.0001      | <.0001      | <.0001      | <.0001      | <.0001      | <.0001      | <.0001      | <.0001      | <.0001      | <.0001      | <.0001      | <.0001      | <.0001      |
|        | Summer | <i>N</i>               | 60                   | 54          | 52          | 50          | 19          | 60          | 55          | 58          | 57          | 58          | 60          | 59          | 58          | 58          | 60          |
|        |        | <b>r</b>               | <b>0.27</b>          | -0.16       | -0.12       | 0.16        | -0.12       | 0.09        | 0.15        | -0.15       | -0.18       | -0.23       | -0.05       | 0.17        | -0.20       | <b>0.27</b> | 0.25        |
|        |        | <i>p-value</i>         | 0.0344               | 0.2291      | 0.3532      | 0.2855      | 0.3589      | 0.4666      | 0.2258      | 0.2437      | 0.2545      | 0.1009      | 0.7183      | 0.1945      | 0.1348      | 0.0354      | 0.0570      |
| B      | Winter | <i>N</i>               | 62                   | 59          | 61          | 47          | 62          | 61          | 63          | 63          | 41          | 53          | 59          | 63          | 59          | 61          | 59          |
|        |        | Distance (km)          | <0.5                 | 12.5        | 13.1        | 8.6         | 13.4        | 12          | 8.9         | 8.8         | 2.9         | 8.4         | 8.1         | 9.8         | 29.5        | 20          | 18.1        |
|        |        | <b>r</b>               | <b>0.99</b>          | <b>0.80</b> | <b>0.81</b> | <b>0.78</b> | <b>0.80</b> | <b>0.87</b> | <b>0.90</b> | <b>0.87</b> | <b>0.89</b> | <b>0.71</b> | <b>0.90</b> | <b>0.75</b> | <b>0.70</b> | <b>0.67</b> | <b>0.83</b> |
|        | Summer | <i>p-value</i>         | <.0001               | <.0001      | <.0001      | <.0001      | <.0001      | <.0001      | <.0001      | <.0001      | <.0001      | <.0001      | <.0001      | <.0001      | <.0001      | <.0001      | <.0001      |
|        |        | <i>N</i>               | 60                   | 60          | 65          | 60          | 65          | 61          | 62          | 65          | 58          | 57          | 61          | 62          | 65          | 65          | 62          |
|        |        | <b>r</b>               | <b>0.35</b>          | -0.14       | 0.23        | -0.17       | <b>0.25</b> | <b>0.26</b> | <b>0.49</b> | <b>0.41</b> | <b>0.55</b> | 0.02        | <b>0.53</b> | <b>0.45</b> | <b>0.45</b> | <b>0.31</b> | <b>0.38</b> |
|        |        | <i>p-value</i>         | 0.0058               | 0.2596      | 0.1012      | 0.2078      | 0.0458      | 0.0380      | <.0001      | 0.0008      | <.0001      | 0.8811      | <.0001      | 0.0002      | 0.0001      | 0.0186      | 0.0019      |
|        |        | <i>N</i>               | 59                   | 66          | 54          | 56          | 62          | 64          | 63          | 64          | 63          | 49          | 64          | 62          | 66          | 56          | 63          |

Note: **Bold** figures are correlation coefficients with *p-value* < 0.05.

<sup>a</sup> *r* = Spearman Correlation Coefficients; *p-value* = Probability > |*r*| under H0: Rho=0; *N* = Number of Observations.

<sup>b</sup> The full name and detail information for outdoor sites are given in Table S1.



**Table S5.** Spearman Correlation Coefficients for 1-hour average PM<sub>2.5</sub> concentrations among outdoor locations by season.

| Season | Location          | Outdoor fixed site monitor (FSM) <sup>a</sup> |             |             |             |             |             |             |             |             |             |             |             |             |             |
|--------|-------------------|-----------------------------------------------|-------------|-------------|-------------|-------------|-------------|-------------|-------------|-------------|-------------|-------------|-------------|-------------|-------------|
|        |                   | <i>R1</i>                                     | <i>R2</i>   | <i>R3</i>   | <i>G1</i>   | <i>G2</i>   | <i>G3</i>   | <i>G4</i>   | <i>G5</i>   | <i>G6</i>   | <i>G7</i>   | <i>G8</i>   | <i>G9</i>   | <i>G10</i>  | <i>BG</i>   |
| Winter | <i>Transect_A</i> | <b>0.72</b>                                   | <b>0.75</b> | <b>0.84</b> | <b>0.78</b> | <b>0.79</b> | <b>0.82</b> | <b>0.80</b> | <b>0.82</b> | <b>0.87</b> | <b>0.83</b> | <b>0.80</b> | <b>0.73</b> | <b>0.69</b> | <b>0.85</b> |
|        | <i>Transect_B</i> | <b>0.77</b>                                   | <b>0.75</b> | <b>0.73</b> | <b>0.74</b> | <b>0.84</b> | <b>0.89</b> | <b>0.83</b> | <b>0.87</b> | <b>0.67</b> | <b>0.89</b> | <b>0.69</b> | <b>0.64</b> | <b>0.66</b> | <b>0.83</b> |
|        | <i>R1</i>         | <b>1.00</b>                                   | <b>0.93</b> | <b>0.89</b> | <b>0.94</b> | <b>0.87</b> | <b>0.87</b> | <b>0.91</b> | <b>0.86</b> | <b>0.77</b> | <b>0.82</b> | <b>0.73</b> | <b>0.61</b> | <b>0.57</b> | <b>0.70</b> |
|        | <i>R2</i>         |                                               | <b>1.00</b> | <b>0.89</b> | <b>0.95</b> | <b>0.87</b> | <b>0.87</b> | <b>0.89</b> | <b>0.87</b> | <b>0.79</b> | <b>0.85</b> | <b>0.74</b> | <b>0.71</b> | <b>0.68</b> | <b>0.78</b> |
|        | <i>R3</i>         |                                               |             | <b>1.00</b> | <b>0.93</b> | <b>0.88</b> | <b>0.85</b> | <b>0.93</b> | <b>0.85</b> | <b>0.89</b> | <b>0.85</b> | <b>0.81</b> | <b>0.64</b> | <b>0.62</b> | <b>0.77</b> |
|        | <i>G1</i>         |                                               |             |             | <b>1.00</b> | <b>0.91</b> | <b>0.91</b> | <b>0.95</b> | <b>0.95</b> | <b>0.91</b> | <b>0.92</b> | <b>0.88</b> | <b>0.71</b> | <b>0.71</b> | <b>0.84</b> |
|        | <i>G2</i>         |                                               |             |             |             | <b>1.00</b> | <b>0.88</b> | <b>0.93</b> | <b>0.88</b> | <b>0.78</b> | <b>0.89</b> | <b>0.69</b> | <b>0.64</b> | <b>0.65</b> | <b>0.81</b> |
|        | <i>G3</i>         |                                               |             |             |             |             | <b>1.00</b> | <b>0.89</b> | <b>0.85</b> | <b>0.77</b> | <b>0.87</b> | <b>0.75</b> | <b>0.71</b> | <b>0.68</b> | <b>0.81</b> |
|        | <i>G4</i>         |                                               |             |             |             |             |             | <b>1.00</b> | <b>0.91</b> | <b>0.84</b> | <b>0.89</b> | <b>0.78</b> | <b>0.66</b> | <b>0.68</b> | <b>0.81</b> |
|        | <i>G5</i>         |                                               |             |             |             |             |             |             | <b>1.00</b> | <b>0.86</b> | <b>0.94</b> | <b>0.80</b> | <b>0.70</b> | <b>0.74</b> | <b>0.85</b> |
|        | <i>G6</i>         |                                               |             |             |             |             |             |             |             | <b>1.00</b> | <b>0.83</b> | <b>0.86</b> | <b>0.60</b> | <b>0.62</b> | <b>0.75</b> |
|        | <i>G7</i>         |                                               |             |             |             |             |             |             |             |             | <b>1.00</b> | <b>0.77</b> | <b>0.74</b> | <b>0.79</b> | <b>0.90</b> |
|        | <i>G8</i>         |                                               |             |             |             |             |             |             |             |             |             | <b>1.00</b> | <b>0.75</b> | <b>0.71</b> | <b>0.78</b> |
|        | <i>G9</i>         |                                               |             |             |             |             |             |             |             |             |             |             | <b>1.00</b> | <b>0.84</b> | <b>0.85</b> |
|        | <i>G10</i>        |                                               |             |             |             |             |             |             |             |             |             |             |             | <b>1.00</b> | <b>0.88</b> |
|        | <i>BG</i>         |                                               |             |             |             |             |             |             |             |             |             |             |             |             | <b>1.00</b> |
| Summer | <i>Transect_A</i> | 1.00                                          | .           | <b>0.35</b> | 0.20        | <b>0.29</b> | 0.21        | <b>0.33</b> | <b>0.51</b> | 0.18        | <b>0.43</b> | 0.05        | <b>0.43</b> | 0.11        | <b>0.26</b> |
|        | <i>Transect_B</i> |                                               | 1.00        | 0.06        | <b>0.38</b> | 0.02        | <b>0.35</b> | 0.21        | 0.18        | 0.04        | <b>0.30</b> | 0.22        | <b>0.28</b> | -0.01       | 0.11        |
|        | <i>R1</i>         |                                               |             | 1.00        | <b>0.27</b> | <b>0.22</b> | <b>0.30</b> | <b>0.32</b> | -0.01       | 0.11        | 0.09        | 0.07        | <b>0.20</b> | 0.01        | 0.14        |
|        | <i>R2</i>         |                                               |             |             | 1.00        | 0.00        | <b>0.46</b> | <b>0.24</b> | 0.03        | <b>0.19</b> | <b>0.25</b> | 0.10        | <b>0.28</b> | 0.13        | 0.17        |
|        | <i>R3</i>         |                                               |             |             |             | 1.00        | <b>0.22</b> | -0.07       | 0.06        | -0.08       | 0.07        | -0.13       | -0.05       | -0.07       | -0.17       |
|        | <i>G1</i>         |                                               |             |             |             |             | 1.00        | 0.17        | <b>0.23</b> | <b>0.32</b> | <b>0.35</b> | 0.03        | <b>0.36</b> | 0.02        | 0.17        |
|        | <i>G2</i>         |                                               |             |             |             |             |             | 1.00        | 0.06        | <b>0.19</b> | 0.11        | 0.04        | <b>0.35</b> | 0.09        | <b>0.17</b> |
|        | <i>G3</i>         |                                               |             |             |             |             |             |             | 1.00        | 0.13        | <b>0.25</b> | 0.10        | <b>0.33</b> | 0.14        | 0.15        |
|        | <i>G4</i>         |                                               |             |             |             |             |             |             |             | 1.00        | 0.18        | -0.15       | <b>0.38</b> | 0.12        | <b>0.25</b> |
|        | <i>G5</i>         |                                               |             |             |             |             |             |             |             |             | 1.00        | 0.12        | <b>0.26</b> | <b>0.26</b> | 0.17        |
|        | <i>G6</i>         |                                               |             |             |             |             |             |             |             |             |             | 1.00        | 0.11        | 0.14        | 0.16        |
|        | <i>G7</i>         |                                               |             |             |             |             |             |             |             |             |             |             | 1.00        | <b>0.22</b> | <b>0.26</b> |
|        | <i>G8</i>         |                                               |             |             |             |             |             |             |             |             |             |             |             | 1.00        | 0.07        |
|        | <i>G9</i>         |                                               |             |             |             |             |             |             |             |             |             |             |             |             | 1.00        |
|        | <i>G10</i>        |                                               |             |             |             |             |             |             |             |             |             |             |             |             |             |
|        | <i>BG</i>         |                                               |             |             |             |             |             |             |             |             |             |             |             |             |             |

Note: **Bold** figures are correlation coefficients with *p-value* < 0.05.

<sup>a</sup> The full name and detail information for outdoor sites are given in Table S1.

**Table S6 Infiltration factors estimated from LRMs with and without autocorrelation correction**

| Season | School         | N  | Without autocorrelation correction |                              |                  | With autocorrelation correction |                              |                |                  |
|--------|----------------|----|------------------------------------|------------------------------|------------------|---------------------------------|------------------------------|----------------|------------------|
|        |                |    | IF <sup>a</sup>                    | C <sub>NA</sub> <sup>b</sup> | R <sup>2 d</sup> | IF <sup>a</sup>                 | C <sub>NA</sub> <sup>b</sup> | ρ <sup>c</sup> | R <sup>2 d</sup> |
|        |                |    | (Mean±SE <sup>e</sup> )            | (Mean±SE)                    |                  | (Mean±SE)                       | (Mean±SE)                    | (Mean±SE)      |                  |
| Winter | A              | 60 | 0.91±0.02                          | 2.5±0.9                      | 0.98             | 0.88±0.03                       | 3.4±1.4                      | 0.7±0.1        | 0.98             |
|        | B              | 60 | 1.00±0.02                          | -2.7±1.2                     | 0.99             | 1.00±0.02                       | -2.8±1.4                     | 0.2±0.1        | 0.99             |
|        | B <sup>f</sup> | 60 | 0.97±0.02                          | 0                            | 0.99             |                                 |                              |                |                  |
| Summer | A              | 62 | 0.27±0.13                          | 3.7±0.9                      | 0.07             | 0.35±0.09                       | 3.3±0.8                      | 0.8±0.1        | 0.65             |
|        | B              | 59 | 0.25±0.09                          | 2.9±0.7                      | 0.13             | 0.22±0.06                       | 2.9±0.6                      | 0.6±0.2        | 0.49             |

Notes:

<sup>a</sup> IF is infiltration factor of PM<sub>2.5</sub> concentrations from outdoor transect to school indoor, derived based on Eq. (1).

<sup>b</sup> C<sub>NA</sub> is non-ambient PM<sub>2.5</sub> concentrations at school indoor, derived from Eq. (1), the negative values for school B in winter are not statistically significant than zero after autocorrelation correction.

<sup>c</sup> ρ is autocorrelation parameter derived based on Eq. (2).

<sup>d</sup> R<sup>2</sup> is coefficient of determination of linear regression models (LRMs) with and without autocorrelation.

<sup>e</sup> SE refers to standard error.

<sup>f</sup> This serves as a sensitivity case for school B in winter by setting C<sub>NA</sub> to be zero, which was originally estimated to be negative. The IF was recalibrated based on zero intercept (C<sub>NA</sub> = 0).

**Table S7** Proximity factors estimated from LRM between selected schools and FSMs by season

| School | FSM | Winter |                         |                              |                             | Summer |                 |                              |                             |
|--------|-----|--------|-------------------------|------------------------------|-----------------------------|--------|-----------------|------------------------------|-----------------------------|
|        |     | N      | PF <sup>a</sup>         | C <sub>UE</sub> <sup>b</sup> | R <sup>2</sup> <sup>c</sup> | N      | PF <sup>a</sup> | C <sub>UE</sub> <sup>b</sup> | R <sup>2</sup> <sup>c</sup> |
|        |     |        | (Mean±SE <sup>d</sup> ) | (Mean±SE)                    |                             |        | (Mean±SE)       | (Mean±SE)                    |                             |
| A      | R1  | 54     | 0.89±0.17               | 1.6±8.3                      | 0.32                        | 59     | 0.07±0.04       | 5.3±0.8                      | 0.05                        |
|        | R2  | 52     | 0.94±0.17               | 8.0±6.6                      | 0.36                        | 61     | 0.09±0.05       | 5.7±0.5                      | 0.05                        |
|        | R3  | 51     | 1.11±0.15               | -1.8±6.8                     | 0.50                        | 47     | 0.10±0.05       | 5.4±0.8                      | 0.08                        |
|        | G1  | 18     | 1.31±0.14               | -8.0±4.0                     | 0.83                        | 63     | 0.10±0.08       | 5.5±0.9                      | 0.02                        |
|        | G2  | 58     | 0.86±0.15               | 15.3±5.2                     | 0.36                        | 61     | 0.22±0.08       | 5.1±0.6                      | 0.11                        |
|        | G3  | 56     | 1.03±0.15               | 8.5±5.6                      | 0.45                        | 63     | 0.13±0.06       | 4.8±0.9                      | 0.07                        |
|        | G4  | 59     | 0.84±0.13               | 10.7±5.2                     | 0.42                        | 63     | 0.11±0.04       | 5.3±0.6                      | 0.10                        |
|        | G5  | 57     | 1.15±0.12               | 3.8±4.4                      | 0.60                        | 42     | 0.17±0.06       | 5.4±0.6                      | 0.18                        |
|        | G6  | 59     | 1.65±0.13               | -6.3±4.2                     | 0.72                        | 53     | 0.01±0.07       | 6.8±0.8                      | 0.00                        |
|        | G7  | 60     | 1.18±0.13               | 4.6±4.5                      | 0.57                        | 60     | 0.21±0.08       | 4.8±0.7                      | 0.11                        |
|        | G8  | 59     | 1.36±0.09               | -0.2±3.1                     | 0.79                        | 63     | 0.02±0.04       | 6.9±0.4                      | 0.00                        |
|        | G9  | 58     | 0.94±0.09               | 7.1±3.6                      | 0.66                        | 59     | 0.16±0.08       | 5.8±0.6                      | 0.05                        |
|        | G10 | 58     | 0.83±0.13               | 0.5±6.7                      | 0.42                        | 61     | 0.21±0.06       | 4.3±0.7                      | 0.18                        |
|        | BG  | 60     | 0.97±0.09               | -2.6±4.2                     | 0.68                        | 59     | 0.26±0.07       | 4.6±0.6                      | 0.20                        |
| B      | R1  | 60     | 1.20±0.07               | -15.9±5.3                    | 0.83                        | 66     | 0.03±0.04       | 6.7±0.8                      | 0.01                        |
|        | R2  | 65     | 1.19±0.06               | 1.1±3.4                      | 0.87                        | 54     | 0.21±0.05       | 4.5±0.8                      | 0.24                        |
|        | R3  | 60     | 0.94±0.10               | 1.8±5.6                      | 0.61                        | 59     | 0.01±0.06       | 7.4±1.0                      | 0.00                        |
|        | G1  | 65     | 1.27±0.06               | -9.2±3.9                     | 0.87                        | 62     | 0.14±0.09       | 5.9±1.0                      | 0.04                        |
|        | G2  | 61     | 1.86±0.12               | -23.0±6.2                    | 0.79                        | 64     | 0.12±0.07       | 6.5±0.6                      | 0.04                        |
|        | G3  | 62     | 1.48±0.07               | -8.0±3.7                     | 0.89                        | 64     | 0.06±0.06       | 6.7±0.9                      | 0.01                        |
|        | G4  | 65     | 1.47±0.07               | -19.7±4.0                    | 0.89                        | 63     | 0.05±0.06       | 7.0±0.6                      | 0.01                        |
|        | G5  | 58     | 1.20±0.05               | 1.8±2.9                      | 0.91                        | 63     | 0.17±0.06       | 6.0±0.6                      | 0.13                        |
|        | G6  | 57     | 1.22±0.11               | 3.7±4.6                      | 0.69                        | 51     | 0.06±0.09       | 6.5±1.1                      | 0.01                        |
|        | G7  | 61     | 1.17±0.04               | 5.1±2.4                      | 0.93                        | 64     | 0.29±0.08       | 5.2±0.7                      | 0.18                        |
|        | G8  | 62     | 1.57±0.08               | -7.5±3.9                     | 0.85                        | 62     | 0.09±0.06       | 6.6±0.6                      | 0.04                        |
|        | G9  | 65     | 1.08±0.10               | 15.4±5.4                     | 0.63                        | 66     | 0.06±0.10       | 7.0±0.7                      | 0.01                        |
|        | G10 | 65     | 1.10±0.08               | -4.0±5.7                     | 0.73                        | 56     | 0.19±0.06       | 5.2±0.8                      | 0.15                        |
|        | BG  | 62     | 1.21±0.08               | -8.2±4.9                     | 0.81                        | 63     | 0.24±0.07       | 5.8±0.5                      | 0.15                        |

Note:

<sup>a</sup> PF refers to proximity factor derived based on linear regression of PM<sub>2.5</sub> concentrations between transects in close proximity to the selected school and the FSMs.<sup>b</sup> C<sub>UE</sub> refers to unexplained concentrations at a school that is not explained by the variability in the concentration at the selected FSM; negative values suggest that a portion of the concentration measured at FSM is not useful in interpreting the variations in school concentrations.<sup>c</sup> R<sup>2</sup> is coefficient of determination of linear regression models (LRMs).<sup>d</sup> SE refers to standard error.

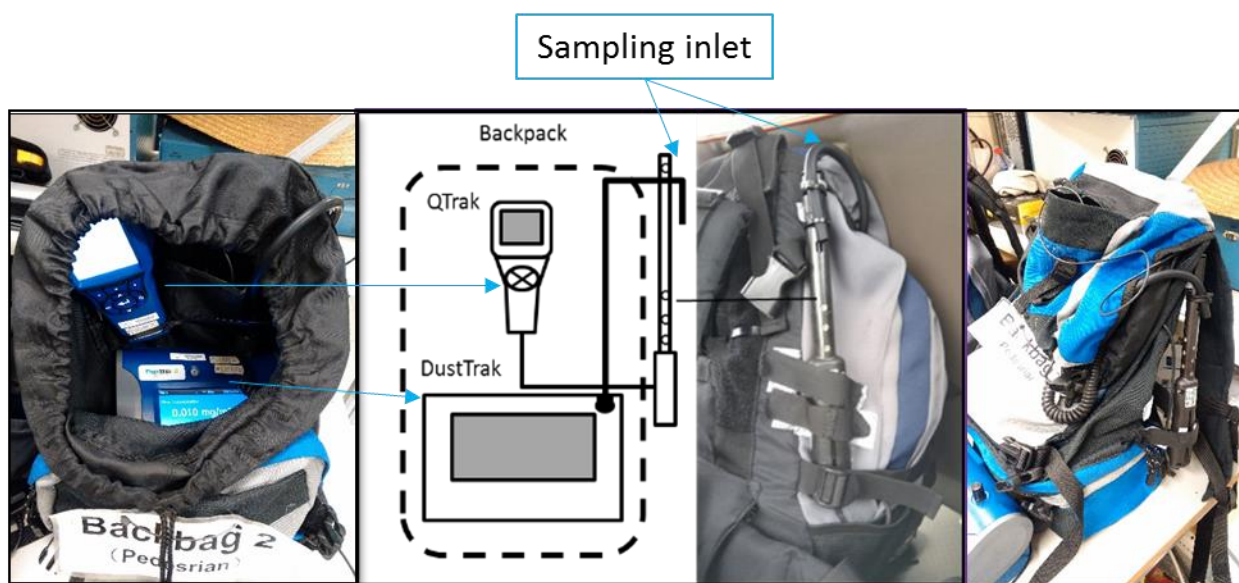

(a) Design of sampling backpack

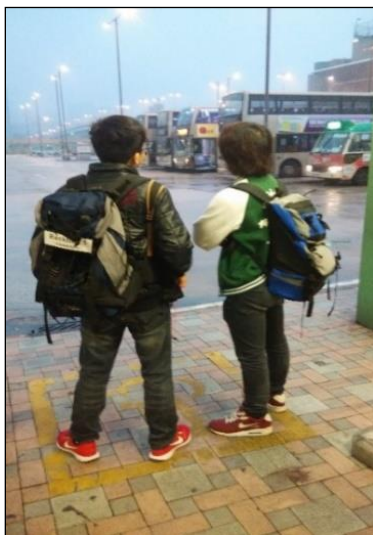

(b) Cross-calibration

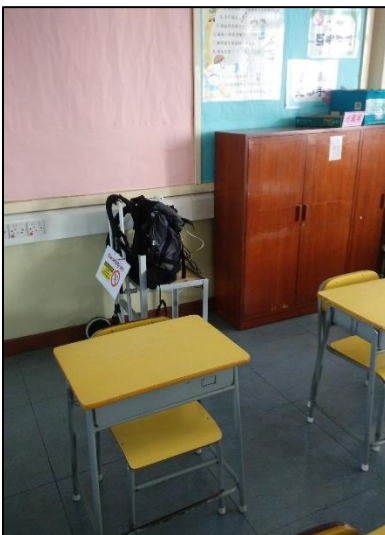

(c) Sampling set up at school indoor

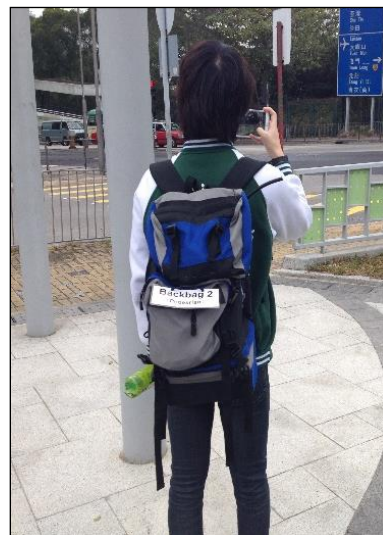

(d) Outdoor sampling

Figure S1. The (a) design of sampling backpack, (b) cross-calibration during trip to school, (c) sampling set up at school indoor and (d) outdoor transect

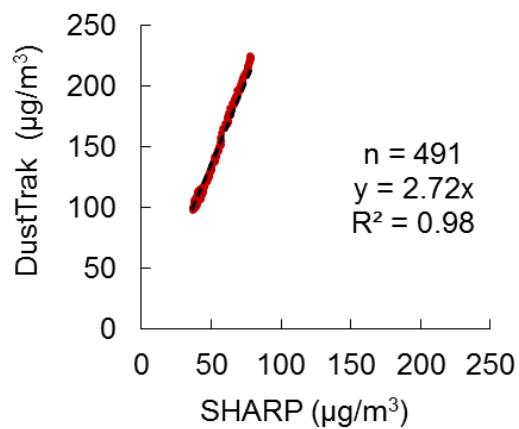

(a) DustTrak 1, winter

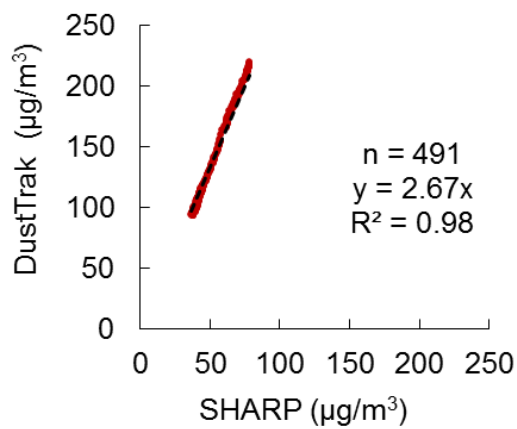

(b) DustTrak 2, winter

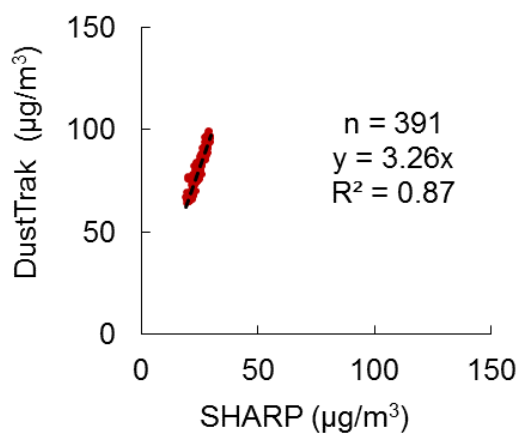

(c) DustTrak 1, summer

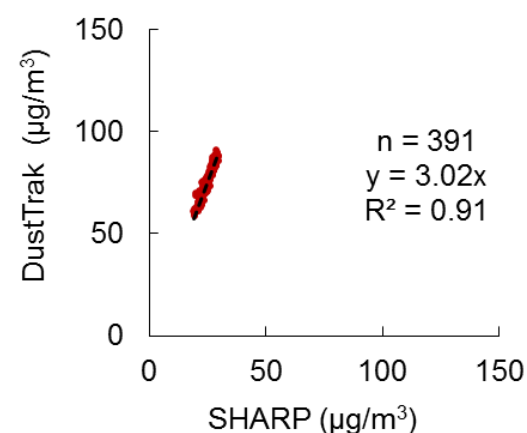

(d) DustTrak 2, summer

Figure S2. Calibration of 1-minute average DustTrak 1 (used for indoor) and DustTrak 2 (used for outdoor transect) against SHARP at HKUST Supersite for winter and summer season

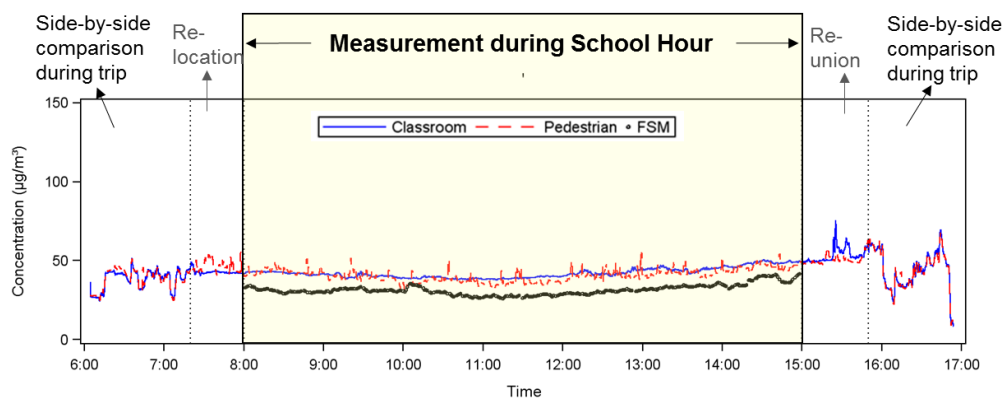

(a) School A, winter (09/01/2015)

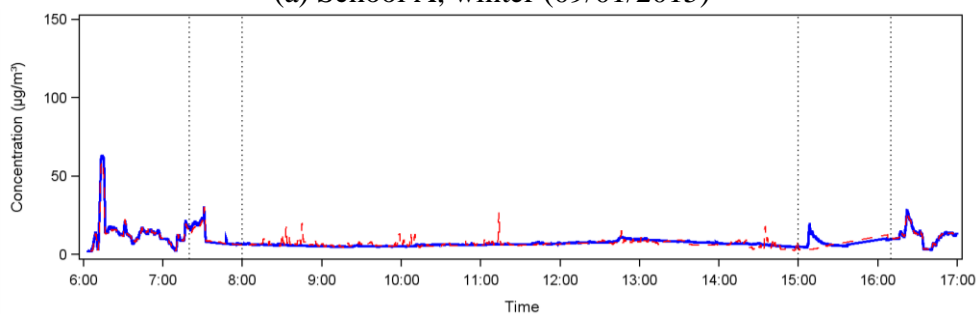

(b) School A, summer (10/06/2015)

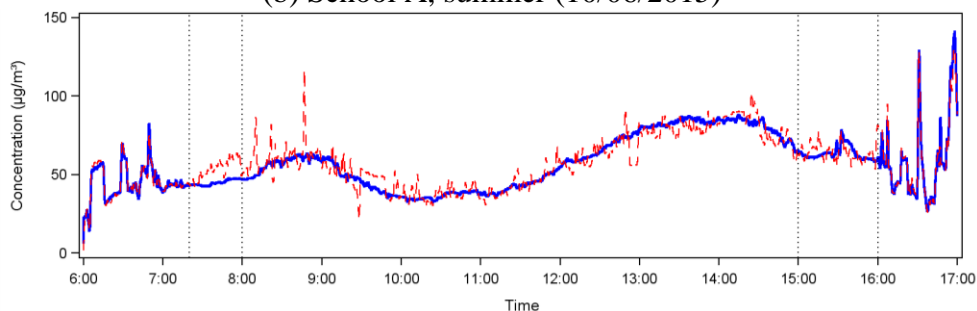

(c) School B, winter (27/01/2015)

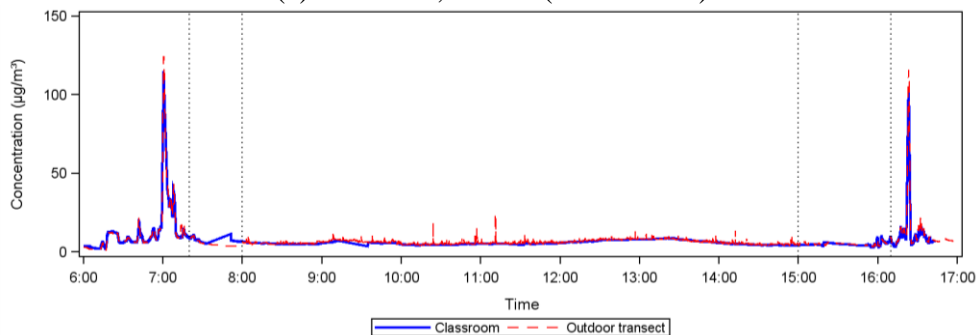

(d) School B, summer (16/06/2015)

Note: <sup>a</sup> the DustTraks were calibrated against the reference method (SHARP) before the whole measurement. Their performance was cross-checked twice every day during the trips between lab and measured schools.

<sup>b</sup> Re-location: the two sampling backpacks diverged to different sampling locations.

<sup>c</sup> Re-union: the two sampling backpacks met together after sampling.

Figure S3. Examples of time plots of PM<sub>2.5</sub> concentration measured in classroom and outdoor transect at two schools during winter and summer.

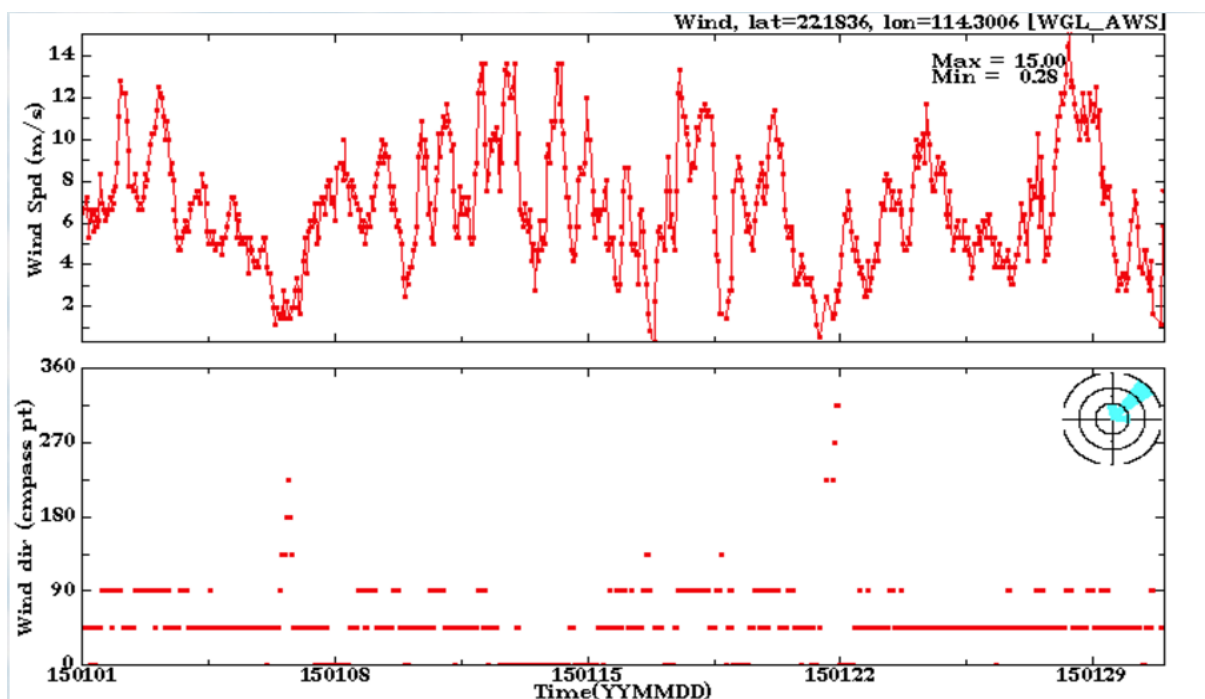

(a) Wind speed and wind direction, winter

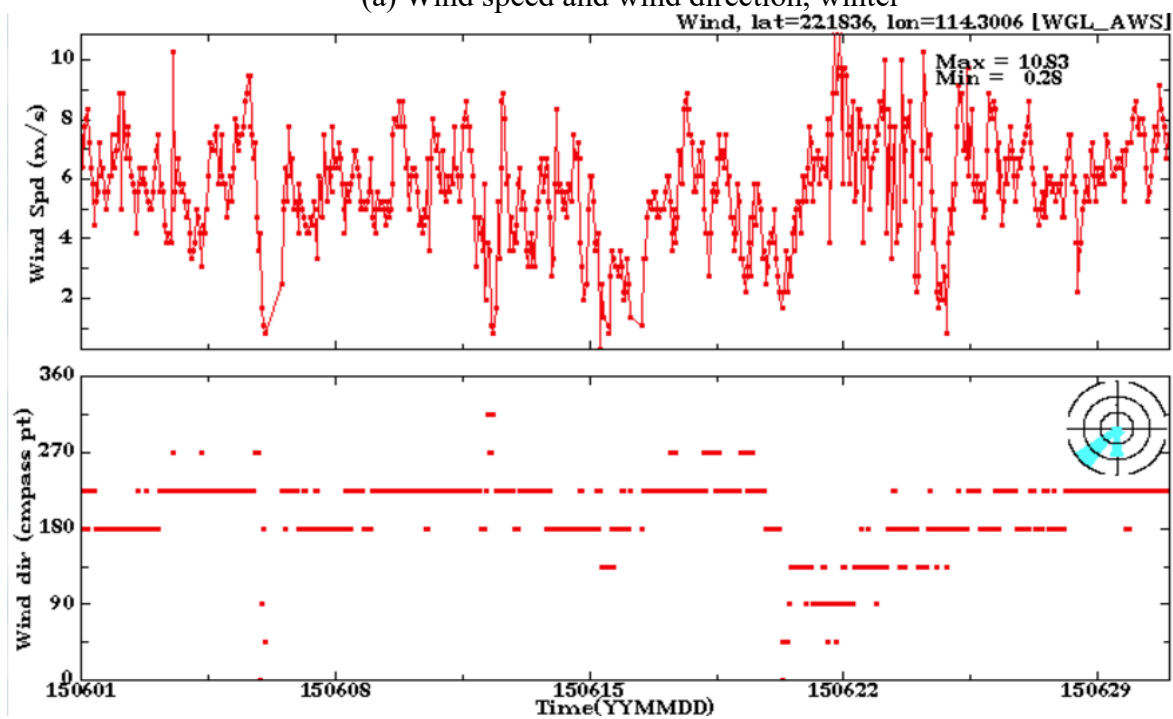

(b) Wind speed and wind direction, summer

Figure S4. Wind rose maps from a background meteorological station (Waglan island) in Hong Kong during measurement at schools for (a) winter and (b) summer in 2015

## References

1. Levy, J. I.; Dumyahn, T.; Spengler, J. D., Particulate matter and polycyclic aromatic hydrocarbon concentrations in indoor and outdoor microenvironments in Boston, Massachusetts. *Journal Of Exposure Analysis And Environmental Epidemiology* **2002**, *12*, (2), 104-114.
2. Houseman, E. A.; Ryan, L.; Levy, J. I.; Spengler, J. D., Autocorrelation in real-time continuous monitoring of microenvironments. *J Appl Stat* **2002**, *29*, (6), 855-872.
3. Perez, P.; Trier, A.; Reyes, J., Prediction of PM<sub>2.5</sub> concentrations several hours in advance using neural networks in Santiago, Chile. *Atmos Environ* **2000**, *34*, (8), 1189-1196.
4. DeGaetano, A. T.; Doherty, O. M., Temporal, spatial and meteorological variations in hourly PM<sub>2.5</sub> concentration extremes in New York City. *Atmos Environ* **2004**, *38*, (11), 1547-1558.
